# Supplementary material for: Multivariate Analysis on Physical Activity, Emotional and Health Status of University Students Caused by COVID-19 Confinement
Source: MDPI journal article supplement (doi:10.3390/ijerph191711016), 2022-09-03
Supplement: s1 [file s1]

**Supplementary Table S1: Sample estimation formulas**

| <b>Initial sample size <math>n_o</math></b>                                                                                                                                                                                                                                                                                                                             |     |
|-------------------------------------------------------------------------------------------------------------------------------------------------------------------------------------------------------------------------------------------------------------------------------------------------------------------------------------------------------------------------|-----|
| This equation 1, for a population greater than 10,000:                                                                                                                                                                                                                                                                                                                  |     |
| $n_o = \frac{Z^2 * p * q}{e^2}$                                                                                                                                                                                                                                                                                                                                         | (1) |
| $n_o$ = Initial sample size for a simple random sample.<br>$Z$ = Statistical parameter that depends on the confidence level (percentile of a standard normal distribution).<br>$p$ = The probability of occurrence of the studied event (success).<br>$q = (1 - p)$ = The probability that the event studied will not occur.<br>$e$ = Maximum accepted estimation error |     |
| <b>Population adjustment <math>n'</math></b>                                                                                                                                                                                                                                                                                                                            |     |
| $n' = \frac{n_o}{1 + \frac{(n_o - 1)}{N}}$                                                                                                                                                                                                                                                                                                                              | (2) |
| $n'$ = Adjusted population<br>$N$ = Size of the population or universe of the population                                                                                                                                                                                                                                                                                |     |

**Supplementary Table S2: Survey of university students**

The Escuela Superior Politécnica del Litoral ESPOL of Ecuador is conducting a study on the "Effects of physical and emotional activity and health status due to COVID-19 confinement in university students". Your authorization is requested to participate in this research project whose objective is to analyze the impact of confinement due to the pandemic. Your participation is completely voluntary, if you do not wish to participate, there will be no negative consequences. You may withdraw from the study at any time. The response is completely anonymous. If you have any questions, please contact Mayra Brocel/Bethy Merchán, whose e-mail addresses are: mbrocel@espol.edu.ec and betgumer@espol.edu.ec.

I do agree to participate ☐ I do not agree to participate ☐

| <b>Sociodemographic aspects</b> |                                  |                                   |
|---------------------------------|----------------------------------|-----------------------------------|
| <b>No.</b>                      | <b>Question</b>                  | <b>Response</b>                   |
| 1.                              | Gender                           | Male<br>Feminine                  |
| 2.                              | Age                              | Single<br>Married                 |
| 3.                              | Marital status                   | Divorced<br>Widower<br>Free union |
| 4.                              | Nationality                      |                                   |
| 5.                              | No. registration                 |                                   |
| 6.                              | Indicate your faculty and career |                                   |

|                                                                                                                                                                                                                                                                                                             |                                                                        |                                                                                                                                                                                                                                                                                                                                                                                            |
|-------------------------------------------------------------------------------------------------------------------------------------------------------------------------------------------------------------------------------------------------------------------------------------------------------------|------------------------------------------------------------------------|--------------------------------------------------------------------------------------------------------------------------------------------------------------------------------------------------------------------------------------------------------------------------------------------------------------------------------------------------------------------------------------------|
| 7.                                                                                                                                                                                                                                                                                                          | Are you currently working?<br>(Q1)                                     | Yes<br>No                                                                                                                                                                                                                                                                                                                                                                                  |
| <b>Health aspects</b>                                                                                                                                                                                                                                                                                       |                                                                        |                                                                                                                                                                                                                                                                                                                                                                                            |
| 8.                                                                                                                                                                                                                                                                                                          | Which of these diseases do you have or have you had?<br>(Q2)           | Obesity<br>Hypertension<br>Diabetes<br>High cholesterol<br>Cancer<br>Circulation problems<br>Rheumatic diseases<br>Respiratory problems<br>Neurological problems<br>Depression and anxiety<br>Other ()<br>None ()                                                                                                                                                                          |
| 9.                                                                                                                                                                                                                                                                                                          | During confinement, how have the aforementioned diseases changed? (Q3) | My illness has worsened.<br>My health has improved.<br>New diseases have appeared.<br>My health remains stable before and during confinement.                                                                                                                                                                                                                                              |
| 10.                                                                                                                                                                                                                                                                                                         | How have your life habits changed, due to confinement? (Q4)            | I sleep less than before.<br>I sleep more than before.<br>My hours of sleep remain the same before and during the pandemic.<br>I do less weekly physical exercise.<br>I do more weekly physical exercise.<br>My physical activity remains the same before and during the pandemic.<br>I eat more than before.<br>I eat less than before.<br>I eat the same before and during the pandemic. |
| <b>Aspects of moods</b>                                                                                                                                                                                                                                                                                     |                                                                        |                                                                                                                                                                                                                                                                                                                                                                                            |
| 11.                                                                                                                                                                                                                                                                                                         | What emotions best represent your mood, being at home? (Q5)            | Boredom.<br>Anxiety or stress.<br>Frustration and annoyance.<br>Loneliness.<br>Tranquillity.<br>Happy to be home.                                                                                                                                                                                                                                                                          |
| <b>Sports aspects</b>                                                                                                                                                                                                                                                                                       |                                                                        |                                                                                                                                                                                                                                                                                                                                                                                            |
| To answer the following questions, remember that: VIGO-ROSAS physical activities are those that require great physical effort and that make you breathe MUCH harder than normal. MODERATE physical activities are those that require some physical effort and make you breathe a LITTLE harder than normal. |                                                                        |                                                                                                                                                                                                                                                                                                                                                                                            |

|                          |                                                                                                               |                                                                                                                                                                                                                                                                                                                                              |
|--------------------------|---------------------------------------------------------------------------------------------------------------|----------------------------------------------------------------------------------------------------------------------------------------------------------------------------------------------------------------------------------------------------------------------------------------------------------------------------------------------|
| 12.                      | Select the types of physical activity you did weekly BEFORE the pandemic (Q6)                                 | Daily activities (climbing stairs, doing housework).<br>Sports (soccer, basketball, tennis, etc).<br>Aerobic exercise (jogging, walking, cycling).<br>Coordination exercise (dancing).<br>Passive recreation (board game, playing an instrument, attending language academies).<br>Muscular endurance (lifting loads).<br>None of the above. |
| 13.                      | Select the types of physical activity you do weekly DURING the pandemic(Q7)                                   | Daily activities (climbing stairs, doing housework).<br>Sports (soccer, basketball, tennis, etc).<br>Aerobic exercise (jogging, walking, cycling).<br>Coordination exercise (dancing).<br>Passive recreation (board games, playing an instrument, attending language academies).<br>Muscular endurance (lifting loads). None of the above.   |
| 14.                      | How many days/week do you do VIGOROUS physical activity? (Q8)                                                 | 2 to 3<br>4 to 5<br>More than 5<br>None                                                                                                                                                                                                                                                                                                      |
| 15.                      | How many minutes/days do you do VIGOROUS physical activity? (Q9)                                              | 10 to 30 minutes<br>30 to 40 minutes<br>More than 40 minutes<br>Less than 10 minutes                                                                                                                                                                                                                                                         |
| 16.                      | How many days/week do you do MODERATE physical activity? (Q10)                                                | 2 to 3<br>4 to 5<br>More than 5<br>None                                                                                                                                                                                                                                                                                                      |
| 17.                      | How many minutes/days do you do MODERATE physical activity? (Q11)                                             | 10 to 30 minutes<br>30 to 40 minutes<br>More than 40 minutes<br>Less than 10 minutes                                                                                                                                                                                                                                                         |
| 18.                      | How many hours do you spend sitting down receiving classes, studying, or doing projects or homework? (Q12)    | 3 hours or less<br>4 to 6 hours<br>6 to 8 hours<br>More than 8 hours                                                                                                                                                                                                                                                                         |
| <b>Personal question</b> |                                                                                                               |                                                                                                                                                                                                                                                                                                                                              |
| 19.                      | In what aspect of your life do you feel that the confinement due to COVID-19 has affected you the most? (Q13) |                                                                                                                                                                                                                                                                                                                                              |

**Supplementary Table S3: Questions for teacher's interviews**

1. ¿What complementary subject do you teach at ESPOL?
2. ¿What physical activities do you recommend ESPOL students do to improve their quality of life?
3. ¿How often (hours/week) do you recommend doing physical activity to polytechnic students (adults)?
4. ¿How many years have you been teaching classes at ESPOL (indicate the duration and start year)?
5. What challenges have you had teaching classes in this time of pandemic?
6. Recommend some other way to help combat the sedentary lifestyle in polytechnic students.

**Supplementary Table S4: Participant characteristics**

| ID | Gender | Age | Marital status | Employment status |
|----|--------|-----|----------------|-------------------|
| 1  | Male   | 24  | Single         | Yes               |
| 2  | Female | 18  | Single         | No                |
| 3  | Female | 17  | Single         | No                |
| 4  | Female | 20  | Single         | No                |
| 5  | Female | 23  | Single         | Yes               |
| 6  | Male   | 27  | Single         | No                |
| 7  | Male   | 19  | Single         | No                |
| 8  | Female | 18  | Single         | No                |
| 9  | Male   | 20  | Single         | Yes               |
| 10 | Female | 20  | Single         | Yes               |
| 11 | Male   | 21  | Single         | No                |
| 12 | Male   | 19  | Single         | No                |
| 13 | Male   | 21  | Single         | No                |
| 14 | Female | 18  | Single         | No                |
| 15 | Male   | 20  | Single         | No                |
| 16 | Male   | 24  | Single         | Yes               |
| 17 | Female | 25  | Single         | No                |
| 18 | Male   | 19  | Single         | No                |
| 19 | Female | 25  | Single         | No                |
| 20 | Female | 22  | Single         | No                |
| 21 | Female | 25  | Single         | No                |
| 22 | Male   | 22  | Single         | No                |
| 23 | Male   | 23  | Single         | No                |
| 24 | Female | 22  | Single         | No                |
| 25 | Female | 22  | Single         | No                |
| 26 | Female | 22  | Single         | Yes               |
| 27 | Female | 20  | Single         | Yes               |
| 28 | Female | 18  | Single         | Yes               |
| 29 | Female | 21  | Single         | No                |
| 30 | Female | 20  | Single         | No                |
| 31 | Female | 27  | Single         | No                |
| 32 | Female | 22  | Single         | No                |

---

|    |        |    |        |     |
|----|--------|----|--------|-----|
| 33 | Female | 19 | Single | No  |
| 34 | Female | 28 | Single | No  |
| 35 | Female | 22 | Single | No  |
| 36 | Female | 20 | Single | No  |
| 37 | Female | 21 | Single | No  |
| 38 | Male   | 20 | Single | No  |
| 39 | Female | 19 | Single | No  |
| 40 | Male   | 24 | Single | No  |
| 41 | Male   | 21 | Single | Yes |
| 42 | Female | 20 | Single | No  |
| 43 | Female | 19 | Single | No  |
| 44 | Female | 23 | Single | Yes |
| 45 | Female | 24 | Single | No  |
| 46 | Female | 21 | Single | No  |
| 47 | Female | 20 | Single | No  |
| 48 | Male   | 21 | Single | No  |
| 49 | Male   | 19 | Single | Yes |
| 50 | Male   | 21 | Single | No  |
| 51 | Male   | 22 | Single | Yes |
| 52 | Female | 21 | Single | No  |
| 53 | Male   | 20 | Single | No  |
| 54 | Female | 21 | Single | No  |
| 55 | Male   | 24 | Single | No  |
| 56 | Female | 20 | Single | Yes |
| 57 | Female | 19 | Single | No  |
| 58 | Female | 21 | Single | No  |
| 59 | Female | 25 | Single | No  |
| 60 | Male   | 24 | Single | Yes |
| 61 | Female | 24 | Single | No  |
| 62 | Female | 20 | Single | No  |
| 63 | Female | 22 | Single | No  |
| 64 | Male   | 19 | Single | No  |
| 65 | Female | 24 | Single | No  |
| 66 | Male   | 20 | Single | No  |
| 67 | Female | 21 | Single | No  |
| 68 | Female | 18 | Single | No  |
| 69 | Female | 20 | Single | No  |
| 70 | Male   | 22 | Single | No  |
| 71 | Male   | 22 | Single | No  |
| 72 | Male   | 18 | Single | No  |
| 73 | Male   | 21 | Single | No  |
| 74 | Male   | 23 | Single | No  |
| 75 | Male   | 20 | Single | No  |
| 76 | Female | 20 | Single | No  |
| 77 | Female | 18 | Single | No  |
| 78 | Male   | 21 | Single | Yes |
| 79 | Male   | 26 | Single | Yes |
| 80 | Male   | 19 | Single | No  |
| 81 | Male   | 18 | Single | No  |
| 82 | Male   | 20 | Single | No  |
| 83 | Male   | 27 | Single | No  |

---

|     |        |    |         |     |
|-----|--------|----|---------|-----|
| 84  | Male   | 23 | Single  | No  |
| 85  | Male   | 20 | Single  | No  |
| 86  | Female | 18 | Single  | No  |
| 87  | Male   | 24 | Single  | Yes |
| 88  | Male   | 21 | Single  | No  |
| 89  | Female | 20 | Single  | No  |
| 90  | Male   | 21 | Single  | No  |
| 91  | Female | 24 | Single  | No  |
| 92  | Male   | 20 | Single  | Yes |
| 93  | Male   | 20 | Single  | Yes |
| 94  | Female | 20 | Single  | Yes |
| 95  | Female | 24 | Single  | Yes |
| 96  | Male   | 18 | Single  | No  |
| 97  | Female | 20 | Single  | No  |
| 98  | Male   | 21 | Single  | No  |
| 99  | Male   | 20 | Single  | No  |
| 100 | Female | 20 | Single  | No  |
| 101 | Male   | 27 | Single  | No  |
| 102 | Female | 19 | Single  | No  |
| 103 | Female | 27 | Married | Yes |
| 104 | Male   | 19 | Single  | No  |
| 105 | Male   | 19 | Single  | No  |
| 106 | Female | 18 | Single  | No  |
| 107 | Female | 21 | Single  | No  |
| 108 | Female | 23 | Single  | No  |
| 109 | Male   | 21 | Single  | Yes |
| 110 | Male   | 20 | Single  | No  |
| 111 | Female | 20 | Single  | No  |
| 112 | Male   | 19 | Single  | No  |
| 113 | Female | 24 | Single  | No  |
| 114 | Male   | 19 | Single  | No  |
| 115 | Male   | 24 | Single  | Yes |
| 116 | Female | 20 | Single  | No  |
| 117 | Male   | 22 | Single  | No  |
| 118 | Male   | 20 | Single  | No  |
| 119 | Female | 21 | Single  | No  |
| 120 | Female | 22 | Single  | No  |
| 121 | Male   | 20 | Single  | No  |
| 122 | Male   | 20 | Single  | No  |
| 123 | Female | 28 | Single  | No  |
| 124 | Female | 19 | Single  | No  |
| 125 | Female | 19 | Single  | No  |
| 126 | Female | 19 | Single  | No  |
| 127 | Female | 19 | Single  | No  |
| 128 | Male   | 25 | Single  | No  |
| 129 | Male   | 26 | Single  | Yes |
| 130 | Female | 22 | Single  | No  |
| 131 | Female | 20 | Single  | Yes |
| 132 | Female | 22 | Single  | Yes |
| 133 | Male   | 22 | Single  | No  |
| 134 | Female | 22 | Single  | No  |

---

|     |        |    |            |     |
|-----|--------|----|------------|-----|
| 135 | Male   | 25 | Single     | No  |
| 136 | Male   | 25 | Single     | No  |
| 137 | Male   | 26 | Single     | No  |
| 138 | Female | 18 | Single     | No  |
| 139 | Male   | 20 | Single     | No  |
| 140 | Female | 20 | Free union | No  |
| 141 | Male   | 22 | Single     | No  |
| 142 | Female | 19 | Single     | No  |
| 143 | Male   | 29 | Single     | No  |
| 144 | Female | 20 | Single     | No  |
| 145 | Male   | 21 | Single     | No  |
| 146 | Female | 19 | Single     | No  |
| 147 | Female | 24 | Single     | Yes |
| 148 | Male   | 23 | Single     | No  |
| 149 | Male   | 20 | Single     | Yes |
| 150 | Male   | 20 | Single     | Yes |
| 151 | Female | 20 | Single     | No  |
| 152 | Female | 22 | Single     | No  |
| 153 | Female | 20 | Single     | Yes |
| 154 | Female | 21 | Single     | Yes |
| 155 | Male   | 21 | Single     | No  |
| 156 | Female | 21 | Single     | Yes |
| 157 | Female | Q9 | Single     | No  |
| 158 | Male   | 21 | Single     | No  |
| 159 | Female | 22 | Single     | No  |
| 160 | Female | 20 | Single     | No  |
| 161 | Female | 23 | Single     | No  |
| 162 | Female | 21 | Single     | Yes |
| 163 | Male   | 21 | Single     | No  |
| 164 | Male   | 21 | Single     | No  |
| 165 | Female | 20 | Single     | Yes |
| 166 | Male   | 20 | Single     | No  |
| 167 | Female | 21 | Single     | No  |
| 168 | Female | 20 | Single     | No  |
| 169 | Male   | 21 | Single     | No  |
| 170 | Male   | 21 | Single     | No  |
| 171 | Female | 19 | Single     | No  |
| 172 | Female | 20 | Single     | No  |
| 173 | Female | 20 | Single     | No  |
| 174 | Male   | 23 | Single     | No  |
| 175 | Female | 19 | Single     | No  |
| 176 | Female | 20 | Single     | No  |
| 177 | Male   | 20 | Single     | No  |
| 178 | Male   | 21 | Single     | Yes |
| 179 | Female | 23 | Free union | Yes |
| 180 | Female | 25 | Single     | No  |
| 181 | Female | 21 | Single     | No  |
| 182 | Female | 20 | Single     | No  |
| 183 | Male   | 25 | Single     | No  |
| 184 | Male   | 19 | Single     | No  |
| 185 | Female | 21 | Single     |     |

---

|     |        |    |        |     |
|-----|--------|----|--------|-----|
| 186 | Female | 22 | Single | No  |
| 187 | Male   | 22 | Single | No  |
| 188 | Male   | 22 | Single | No  |
| 189 | Female | 21 | Single | No  |
| 190 | Female | 22 | Single | No  |
| 191 | Female | 26 | Single | No  |
| 192 | Female | 21 | Single | Yes |
| 193 | Female | 18 | Single | No  |
| 194 | Female | 22 | Single | Yes |
| 195 | Female | 28 | Single | Yes |
| 196 | Female | 19 | Single | No  |
| 197 | Female | 21 | Single | No  |
| 198 | Male   | 24 | Single | No  |
| 199 | Male   | 21 | Single | No  |
| 200 | Male   | 22 | Single | Yes |
| 201 | Female | 19 | Single | No  |
| 202 | Male   | 21 | Single | Yes |
| 203 | Female | 24 | Single | No  |
| 204 | Male   | 20 | Single | No  |
| 205 | Male   | 25 | Single | No  |
| 206 | Male   | 20 | Single | Yes |
| 207 | Male   | 19 | Single | No  |
| 208 | Male   | 25 | Single | No  |
| 209 | Female | 23 | Single | Yes |
| 210 | Male   | 25 | Single | No  |
| 211 | Male   | 20 | Single | No  |
| 212 | Male   | 27 | Single | Yes |
| 213 | Male   | 21 | Single | Yes |
| 214 | Male   | 22 | Single | No  |
| 215 | Female | 21 | Single | Yes |
| 216 | Male   | 22 | Single | No  |
| 217 | Male   | 21 | Single | Yes |
| 218 | Female | 27 | Single | Yes |
| 219 | Male   | 24 | Single | No  |
| 220 | Male   | 21 | Single | No  |
| 221 | Male   | 23 | Single | Yes |
| 222 | Female | 20 | Single | No  |
| 223 | Female | 20 | Single | No  |
| 224 | Female | 25 | Single | No  |
| 225 | Male   | 21 | Single | Yes |
| 226 | Female | 21 | Single | No  |
| 227 | Male   | 20 | Single | No  |
| 228 | Male   | 20 | Single | No  |
| 229 | Male   | 21 | Single | No  |
| 230 | Female | 25 | Single | No  |
| 231 | Male   | 19 | Single | Yes |
| 232 | Male   | 21 | Single | No  |
| 233 | Male   | 21 | Single | No  |
| 234 | Female | 20 | Single | No  |
| 235 | Male   | 29 | Single | Yes |
| 236 | Female | 20 | Single | No  |



|     |        |    |         |     |
|-----|--------|----|---------|-----|
| 237 | Male   | 21 | Single  | No  |
| 238 | Male   | 19 | Single  | No  |
| 239 | Male   | 19 | Single  | No  |
| 240 | Female | 24 | Single  | Yes |
| 241 | Male   | 20 | Single  | Yes |
| 242 | Male   | 23 | Single  | Yes |
| 243 | Male   | 20 | Single  | No  |
| 244 | Male   | 24 | Single  | No  |
| 245 | Male   | 20 | Single  | No  |
| 246 | Male   | 21 | Single  | Yes |
| 247 | Male   | 24 | Single  | No  |
| 248 | Female | 19 | Single  | Yes |
| 249 | Female | 22 | Single  | No  |
| 250 | Male   | 21 | Single  | Yes |
| 251 | Female | 20 | Single  | No  |
| 252 | Female | 21 | Single  | Yes |
| 253 | Male   | 22 | Single  | No  |
| 254 | Female | 34 | Single  | No  |
| 255 | Male   | 22 | Single  | Yes |
| 256 | Female | 23 | Single  | No  |
| 257 | Male   | 20 | Single  | No  |
| 258 | Female | 22 | Single  | Yes |
| 259 | Male   | 23 | Single  | No  |
| 260 | Female | 21 | Single  | No  |
| 261 | Female | 22 | Single  | No  |
| 262 | Male   | 24 | Single  | No  |
| 263 | Female | 19 | Single  | No  |
| 264 | Male   | 21 | Single  | Yes |
| 265 | Male   | 24 | Single  | No  |
| 266 | Male   | 22 | Single  | No  |
| 267 | Female | 23 | Married | No  |
| 268 | Male   | 21 | Single  | No  |
| 269 | Female | 25 | Single  | Yes |
| 270 | Female | 20 | Single  | No  |
| 271 | Female | 24 | Single  | No  |
| 272 | Female | 27 | Married | No  |
| 273 | Female | 20 | Single  | No  |
| 274 | Male   | 25 | Single  | No  |
| 275 | Female | 23 | Single  | No  |
| 276 | Female | 20 | Single  | No  |
| 277 | Male   | 21 | Single  | No  |
| 278 | Female | 27 | Single  | Yes |
| 279 | Female | 20 | Single  | No  |
| 280 | Male   | 22 | Single  | No  |
| 281 | Female | 25 | Single  | No  |
| 282 | Female | 24 | Single  | No  |
| 283 | Female | 20 | Single  | No  |
| 284 | Female | 24 | Single  | No  |
| 285 | Female | 23 | Single  | Yes |
| 286 | Female | 23 | Married | No  |
| 287 | Male   | 25 | Single  | No  |

---

|     |        |    |         |     |
|-----|--------|----|---------|-----|
| 288 | Male   | 21 | Single  | No  |
| 289 | Male   | 25 | Single  | Yes |
| 290 | Male   | 28 | Single  | No  |
| 291 | Male   | 20 | Single  | No  |
| 292 | Female | 24 | Single  | No  |
| 293 | Male   | 23 | Single  | No  |
| 294 | Male   | 21 | Single  | No  |
| 295 | Female | 22 | Single  | No  |
| 296 | Female | 21 | Single  | No  |
| 297 | Male   | 27 | Single  | Yes |
| 298 | Female | 26 | Single  | No  |
| 299 | Female | 22 | Single  | No  |
| 300 | Male   | 23 | Single  | No  |
| 301 | Female | 21 | Single  | No  |
| 302 | Male   | 20 | Single  | No  |
| 303 | Female | 21 | Single  | No  |
| 304 | Male   | 25 | Single  | No  |
| 305 | Female | 20 | Single  | No  |
| 306 | Female | 29 | Single  | No  |
| 307 | Female | 20 | Single  | No  |
| 308 | Female | 19 | Single  | No  |
| 309 | Female | 22 | Single  | No  |
| 310 | Male   | 22 | Single  | No  |
| 311 | Male   | 23 | Single  | No  |
| 312 | Male   | 22 | Single  | Yes |
| 313 | Female | 21 | Single  | No  |
| 314 | Male   | 22 | Single  | No  |
| 315 | Male   | 22 | Single  | Yes |
| 316 | Male   | 18 | Single  | No  |
| 317 | Male   | 21 | Single  | Yes |
| 318 | Male   | 23 | Single  | Yes |
| 319 | Female | 23 | Single  | No  |
| 320 | Male   | 30 | Single  | No  |
| 321 | Female | 29 | Married | No  |
| 322 | Female | 22 | Single  | No  |
| 323 | Male   | 21 | Single  | Yes |
| 324 | Male   | 23 | Single  | No  |
| 325 | Female | 23 | Single  | Yes |
| 326 | Male   | 23 | Single  | Yes |
| 327 | Male   | 23 | Single  | No  |
| 328 | Female | 22 | Single  | Yes |
| 329 | Male   | 19 | Single  | Yes |
| 330 | Male   | 21 | Single  | No  |
| 331 | Female | 23 | Single  | No  |
| 332 | Male   | 23 | Single  | No  |
| 333 | Female | 21 | Single  | No  |
| 334 | Female | 20 | Single  | No  |
| 335 | Female | 24 | Single  | No  |
| 336 | Male   | 21 | Single  | Yes |
| 337 | Male   | 21 | Single  | No  |
| 338 | Male   | 20 | Single  | No  |

---

|     |        |    |            |     |
|-----|--------|----|------------|-----|
| 339 | Male   | 22 | Single     | Yes |
| 340 | Male   | 18 | Single     | No  |
| 341 | Male   | 21 | Single     | No  |
| 342 | Male   | 20 | Single     | No  |
| 343 | Female | 23 | Single     | Yes |
| 344 | Male   | 23 | Single     | No  |
| 345 | Male   | 19 | Single     | No  |
| 346 | Female | 21 | Single     | No  |
| 347 | Male   | 37 | Married    | Yes |
| 348 | Female | 21 | Single     | No  |
| 349 | Male   | 20 | Single     | No  |
| 350 | Male   | 21 | Single     | Yes |
| 351 | Female | 25 | Single     | No  |
| 352 | Male   | 19 | Single     | Yes |
| 353 | Female | 20 | Single     | No  |
| 354 | Female | 21 | Single     | No  |
| 355 | Male   | 21 | Single     | No  |
| 356 | Female | 21 | Single     | No  |
| 357 | Male   | 21 | Single     | Yes |
| 358 | Male   | 22 | Single     | No  |
| 359 | Female | 20 | Single     | No  |
| 360 | Male   | 21 | Free union | Yes |
| 361 | Female | 20 | Single     | No  |
| 362 | Female | 20 | Single     | Yes |
| 363 | Female | 21 | Single     | No  |
| 364 | Male   | 22 | Single     | No  |
| 365 | Female | 21 | Single     | No  |
| 366 | Female | 24 | Single     | Yes |
| 367 | Male   | 22 | Single     | No  |
| 368 | Female | 22 | Single     | No  |
| 369 | Female | 23 | Single     | Yes |
| 370 | Female | 25 | Single     | No  |
| 371 | Male   | 20 | Single     | No  |
| 372 | Female | 19 | Single     | No  |
| 373 | Female | 27 | Single     | No  |
| 374 | Female | 24 | Single     | No  |
| 375 | Male   | 25 | Single     | Yes |

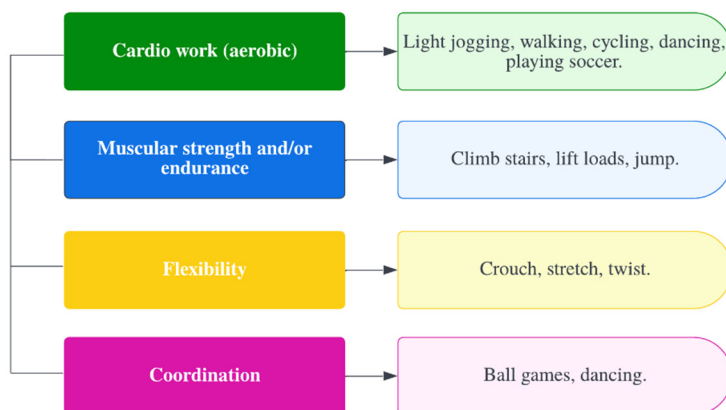

**Supplementary Figure S1.** Type of physical activity [12].
